# Supplementary material
Source: publisher figshare collection journal article supplement (https://tandf.figshare.com/articles/dataset/_/8153282)
Supplement: Supplementary file 1 [file 1]

**Suppl Table S3 Primer sequences for cloing or RT-PCR**

| <b>Target Construct</b>                         | <b>FwdSeq (5'-----&gt;3')</b>       | <b>RevSeq (5'-----&gt;3')</b>       |
|-------------------------------------------------|-------------------------------------|-------------------------------------|
| MEG3 Reporter (MEG3cDNA, Fig.1A)                | TATGGTACCAGCCCCTAGCGCAGACGG         | ATCTCGAGGAGAGCACAGTGGGGTGCG         |
| MEG3 Reporter( $\beta$ -globin-Opt-In1, Fig.1A) | CAGCAGGTAAGTATCAAGGTTACAAGACAG      | AAAAGGGAAAATAGACCAATAGGC            |
| ANCR Reporter (flanking primers,(Fig.1A)        | TTAGGCGGACACAGATGATGAACA            | CCGAGAGAAAAGACAAGAGACCCA            |
| ANCR Reporter (Gene primers, Fig.1A)            | TATGGTACCCCCGCCCCGCGCCGCTCTCTGGTTTG | CGCGGATCCAACCTGCCAGGCTTCTCCACCAGTCG |
| <b>ANCR Detection (Fig. 1C)</b>                 | <b>TGCAGCTGCCTCAGTTCTTA</b>         | <b>AGAGAGACCCTGGGGTTGTT</b>         |
| Truncation (Fig.2B)                             | TATGGTACCAGCCCCTAGCGCAGACGG         | CGCTCGAGCAGGAAGAAGACTTGGGTC         |
| Truncation (Fig.2C)                             | TATGGTACCAGCCCCTAGCGCAGACGG         | CCCTCGAGTTCCACGGAGTAGAGCGAGT        |
| Truncation (Fig.2D)                             | TATGGTACCAGCCCCTAGCGCAGACGG         | GCCCTCGAGCCTGGAGTGCTGTTGGAGA        |
| Truncation (Fig.2E)                             | TATGGTACCAGCCCCTAGCGCAGACGG         | GCCCTCGAGCTATGCCAGATCCTGCCTGA       |
| Truncation (Fig.2F)                             | GCGGTACCAGGAGGTGATCAGCAAATG         | ATCTCGAGGAGAGCACAGTGGGGTGCG         |
| Truncation (Fig.2G)                             | GCGGTACCAGGAGGTGATCAGCAAATG         | CGCTCGAGCAGGAAGAAGACTTGGGTC         |
| Deletion (Fig.2H, 1-797nt)                      | TATGGTACCAGCCCCTAGCGCAGACGG         | CGAGAGGCCCGCCTATGCCAGATCCTGCCTGAG   |
| Deletion (Fig.2H, 1154-1566nt)                  | GATCTGGCATAGGCGGGCCTCTCGTCTCCTTC    | ATCTCGAGGAGAGCACAGTGGGGTGCG         |
| Deletion (Fig.2I, 1-797nt)                      | TATGGTACCAGCCCCTAGCGCAGACGG         | GACAAGGGCTGCTATGCCAGATCCTGCCTGAG    |
| Deletion (Fig.2I, 904-1566nt)                   | ATCTGGCATAGCAGCCCTTGTCCACGGGCTC     | ATCTCGAGGAGAGCACAGTGGGGTGCG         |
| 5'NRE-ANCR Overlap (Fig.3A, NRE)                | GCGGTACCAGGAGGTGATCAGCAAATG         | GGCGCGGGGCGGGCAGGAAGAAGACTTGGGTC    |

|                                                             |                                     |                                   |
|-------------------------------------------------------------|-------------------------------------|-----------------------------------|
| 5'NRE-ANCR Overlap (Fig.3A, ANCR)                           | GTCTTCTTCCTGCCCCGCCCCGCGCCGCCTCTCTG | CTCGGTACCAACCTGCCAGGCTTCTCCAC     |
| 5'NRE-ANCR Expression (Fig.3B, ANCR)                        | TAATACGACTCACTATAGG                 | AGAGAGACCCTGGGGTTGTT              |
| 5'NRE- $\beta$ -globin overlap (Fig.3A, NRE )               | GCGGTACCAGGAGGTGATCAGCAAATG         | GAGTCAGATGCACCAGGAAGAAGACTTGGGTCC |
| 5'NRE- $\beta$ -globin Overlap (Fig.3A, $\beta$ -globin)    | GTCTTCTTCCTGGTGCATCTGACTCCTGAGGAG   | CGGTCTAGATTAGTGATACTTGTGGGCCA     |
| 5'NRE- $\beta$ -globin Expression (Fig.3B, $\beta$ -globin) | TAATACGACTCACTATAGG                 | CACACAGACCAGCACGTTG               |
| <b>Primers for RT-PCR of mRNAs</b>                          |                                     |                                   |
| RAVER1                                                      | GTCTGTGGGAGTCGGACATT                | TCATGGAGTGCTGGTTTCTG              |
| ARG1                                                        | CCCTTTGCTGACATCCCTAA                | ATTGCCAAACTGTGGTCTCC              |
| ALB                                                         | TGGCACAATGAAGTGGGTAA                | CTGAGCAAAGGCAATCAACA              |
| RPS7                                                        | GTGGGAAGCATGTCGTCTTT                | CCACATTGTTCTGCTGTGCT              |
| CCT2                                                        | GTTGGAGAGAAGCCACGAAG                | GTTGCCAGAGCCTTTCAGTC              |
| hnRNPH3                                                     | GGAAGAGGTATGGGAGGACA                | TCGTATTGGATTTAGTGGTGAGAA          |
| STRBP                                                       | AGAGCCCACGCTAACTTTGA                | GGGGACTCTGTTGCACAAAT              |
| SNRPA                                                       | TTGGGACAAAGGATTTGGAG                | GGCTCCGTGATACCAGGATA              |
| hnRNPUL1                                                    | CTTTCCAGCCGAGTTACAGC                | GTTCCACTGCTGGGCATACT              |
| PPP1CA                                                      | CCAAGTTCCTCCACAAGCAC                | GGTCTCGTCCCACTCATCA               |
| ZFR                                                         | CTCCCAAACCACCACAGATT                | TTCTTCTCGTCTTCGCCAGT              |

|                                      |                        |                       |
|--------------------------------------|------------------------|-----------------------|
| CCT5                                 | AACCTGGCGTGTTGTTTAGG   | GGGAAACAAGTGGGTTCTGA  |
| HNRNPLL                              | AGGAGGGAGAGGCTGAATGT   | ACGACGGGTGAAACAGAAAC  |
| YBX3                                 | ACGTGGGACAGACCTTTGAC   | AGAAACCTAGCGGTTGCTGA  |
| hnRNPA1                              | ATACAACCTGCTTGGGTGGA   | TGCATAGGATGTGCCAACAA  |
| hnRNPD                               | GATCCTAAAAGGGCCAAAGC   | CCCATAACCACTCTGCTGGT  |
| TROVE2                               | TGCAGCCACTGAATGAGAAG   | TTGTGCTTATGTCTGGAGCAC |
| SSB                                  | ATCCAAGGCAGAACTCATGG   | TTGCATCTTTGGCTTTACCC  |
| hnRNPL                               | AGAGTCCCATCTGAGCAGGA   | GTACATGGGCAGCACAAATG  |
| hnRNPA2/B1                           | GGCTACGGAGGTGGTTATGA   | CCCATGGCAAATAGGAAGAA  |
| hnRNPU                               | TGGGTAGTGGAGGGGGTAAG   | TTTTGTGGGAGAAGGGCATA  |
| ADAR                                 | TTCCCTCCAACTGCTGACT    | GCCTCGCTCTCTTCCTACAA  |
| SFPQ                                 | TGCCCTTTCTGTTCGTAATCTT | TCCCTTTGCTGTTTTTCCAT  |
| SF3B3                                | ATCTCCACCAACACCCTACG   | ACCCACCAGCACATACCAGT  |
| SMC1A                                | CCTGCTCTCTCCTGTCGTG    | ATTCCTACCCGTCCCTCAAG  |
| GAPDH                                | CTGAGTACGTCGTGGAGTCC   | AGGCAGGGATGATGTTCTGG  |
| <b>Primers for RT-PCR of LncRNAs</b> |                        |                       |
| PVT1 <a href="#">detection</a>       | AGATCCTGCCCTGTTTGCTT   | CCCCAAGCTGGGTCTTCATC  |

|                      |                                             |                        |
|----------------------|---------------------------------------------|------------------------|
| PVT1-Spliced         | CTTCTGGAAGCCTTGCCTGA                        | TCGTAATGGGTTGAAGCTGTCC |
| PVT1-Unspliced       | actttccaattgctcctgtga                       | TCGTAATGGGTTGAAGCTGTCC |
| TUG1 detection       | GTACCTCCACTCAGCACAGT                        | CTGGAGTGGAGGGCTGTAA    |
| TuG1 ends exons      | AGGATGCTCCATCCAAAGTG                        | GCCCCTACTCTTGCTTCACTAC |
| TUG1-Spliced         | ACCACACCCCACAATCTCAA                        | GCCCCTACTCTTGCTTCACTAC |
| TUG1-Unspliced       | tgcatacctaggcaaaaacc                        | GCCCCTACTCTTGCTTCACTAC |
| PSMA3-AS1 detection  | ACTAAAGGCAACTGGCATGGA                       | AGCTGCAGGCGTAATATTGGA  |
| PSMA3-AS1 ends exons | AGCTCCATCGCATTTTATGTTT                      | GGAAACTTCGATTCTGGTCTTT |
| PSMA3-AS1-Spliced    | GCACCAACAAGAACCTGCTTTA                      | GGAAACTTCGATTCTGGTCTTT |
| PSMA3-AS1-Unspliced  | cgatatcacggcaggtcatctc                      | GGAAACTTCGATTCTGGTCTTT |
| MEG3 detection       | TTGACAGGTCAGTCCCTTCC                        | TTCCACGGAGTAGAGCGAGT   |
| MEG3 ends exons      | AGCCCCTAGCGCAGACGGCGGAGAGCAGAGAGGGAGCGCGCCT | GTAGGTGAAGGAGCCCACTT   |
| MEG3-Spliced         | GGGAAGGGACCTCGAATGTG                        | GGCGGGTCTCTACTCAAGG    |
| MEG3-Unspliced       | gaagtgaggggcactaggt                         | GGCGGGTCTCTACTCAAGG    |
