# Supplementary material
Source: publisher figshare collection journal article supplement (https://tandf.figshare.com/articles/dataset/_/8153282)
Supplement: Supplementary file 2 [file 1]

**Suppl Table S1** Proteins present in RNPs assembled on nuclear retention element or the antisense of NRE with or without biotin labelling

| Genes   | NRE+ |    | NRE- |    | AS-NRE+ |    | NRE+ / NRE- | NRE+ / AS-NRE+ | M.W   |
|---------|------|----|------|----|---------|----|-------------|----------------|-------|
|         | U    | T  | U    | T  | U       | T  |             |                |       |
| PTBP1   | 10   | 12 | 4    | 4  | 7       | 7  | 3:1         | 1.7:1          | 57.2  |
| DHX9    | 30   | 30 | 15   | 15 | 17      | 17 | 2:1         | 1.8:1          | 140.9 |
| RAVER1  | 23   | 23 | 5    | 5  |         |    | 4.6:1       |                | 79.5  |
| hnRNPK  | 1    | 16 |      |    | 1       | 12 |             | 1.3:1          | 50.9  |
| hnRNPA1 | 12   | 15 |      |    |         |    |             |                | 33.1  |
| HNRNPU  | 18   | 18 | 9    | 9  | 13      | 13 | 2:1         | 1.4:1          | 88.9  |
| HNRNPL  | 15   | 16 | 2    | 2  | 11      | 11 | 8:1         | 1.5:1          | 58.4  |
| MATR3   | 17   | 17 |      |    | 8       | 8  |             | 2.1:1          | 94.6  |
| ILF3    | 15   | 17 | 3    | 3  | 8       | 8  | 5.7:1       | 2.1:1          | 74.6  |
| Ilf2    | 9    | 9  | 3    | 3  | 4       | 4  | 3:1         | 2.3:1          | 43.0  |
| CCAR2   | 1    | 7  |      |    |         |    |             |                | 17.5  |
| ELAVL1  | 8    | 8  | 3    | 3  | 4       | 4  | 2.7:1       | 2:1            | 36.1  |
| YBX1    | 3    | 9  |      |    | 1       | 4  |             | 2.3:1          | 35.9  |
| YBX3    | 3    | 9  |      |    |         |    |             |                | 37.0  |
| hnRNPD  | 9    | 10 |      |    | 4       | 5  |             | 2:1            | 23.9  |
| FAM120A | 14   | 14 |      |    |         |    |             |                | 121.8 |
| ALB     | 8    | 8  |      |    |         |    |             |                | 51.5  |
| PTBP3   | 5    | 7  |      |    |         |    |             |                | 56.5  |

|           |    |    |   |   |   |   |       |       |       |
|-----------|----|----|---|---|---|---|-------|-------|-------|
| ZFR       | 10 | 10 |   |   |   |   |       |       | 116.9 |
| HNRNPUL1  | 8  | 8  |   |   |   |   |       |       | 84.4  |
| STRBP     | 6  | 8  |   |   |   |   |       |       | 71.9  |
| SNRPA     | 2  | 3  |   |   |   |   |       |       | 31.3  |
| RPS7 (S7) | 3  | 3  |   |   |   |   |       |       | 21.3  |
| Ruvbl2    | 6  | 6  |   |   |   |   |       |       | 46.3  |
| CCT2      | 6  | 6  |   |   |   |   |       |       | 52.7  |
| SNRPD1    | 3  | 3  | 2 | 2 | 2 | 2 | 1.5:1 | 1.5:1 | 13.3  |
| HNRNPC    | 6  | 6  |   |   |   |   |       |       | 25.2  |
| BUB3      | 6  | 6  |   |   |   |   |       |       | 31.7  |
| CCT7      | 5  | 5  |   |   |   |   |       |       | 37.5  |
| hnRNPLL   | 3  | 4  |   |   |   |   |       |       | 56.4  |
| ARG1      | 4  | 4  | 2 | 2 |   |   | 2:1   |       | 25.3  |
| TROVE2    | 4  | 4  |   |   |   |   |       |       | 58.4  |
| EIF4A3    | 1  | 3  |   |   |   |   |       |       | 46.8  |
| CCT5      | 4  | 4  |   |   |   |   |       |       | 55.3  |
| FUBP1     | 3  | 3  |   |   |   |   |       |       | 67.5  |
| SSb       | 3  | 3  |   |   |   |   |       |       | 46.8  |
| PPP1CA    | 3  | 3  |   |   |   |   |       |       | 32.6  |
| SF3A3     | 4  | 4  | 2 | 2 | 5 | 5 | 2:1   | 0.8:1 | 52.4  |
| HNRNPH3   | 3  | 4  |   |   |   |   |       |       | 35.2  |

|          |    |    |    |    |    |    |       |       |       |
|----------|----|----|----|----|----|----|-------|-------|-------|
| SNRNP70  | 3  | 3  |    |    | 3  | 3  |       | 1:1   | 19.8  |
| SMCHD1   | 3  | 3  | 1  | 1  | 1  | 1  | 3:1   | 3:1   | 226.2 |
| RBBP4    | 1  | 3  |    |    |    |    |       |       | 43.5  |
| SMC1A    | 3  | 3  |    |    |    |    |       |       | 59.1  |
| HNRNPR   | 3  | 23 |    |    | 3  | 24 |       | 1:01  | 70.9  |
| HNRNPA2B | 11 | 15 | 4  | 7  | 17 | 22 | 2.1:1 | 0.7:1 | 37.4  |
| SF3B3    | 15 | 15 |    |    | 12 | 12 |       | 1.3:1 | 135.5 |
| SNRPD2   | 4  | 4  | 4  | 4  | 4  | 4  | 1:1   | 1:1   | 12.4  |
| SNRPD3   | 3  | 3  | 3  | 3  | 3  | 3  | 1:1   | 1:1   | 13.3  |
| SFPQ     | 4  | 4  | 7  | 7  | 6  | 6  | 0.6:1 | 0.7:1 | 76.1  |
| PSMA6    | 3  | 3  | 2  | 2  |    |    | 1.5:1 |       | 11.6  |
| ACACA    | 84 | 97 | 81 | 94 | 84 | 97 | 1:01  | 1:1   | 265.4 |
| PRKDC    | 89 | 89 | 76 | 76 | 92 | 92 | 1.2:1 | 1:01  | 465.1 |
| ACACB    | 30 | 43 | 29 | 42 | 32 | 45 | 1:1   | 1:01  | 276.4 |
| PYC      | 39 | 39 | 34 | 34 | 36 | 36 | 1.5:1 | 1.1:1 | 129.6 |
| SYCRIP   | 16 | 19 |    |    | 16 | 21 |       | 0.9:1 | 65.6  |
| EEF1A1   | 4  | 11 | 10 | 10 | 4  | 11 | 1.1:1 | 1:1   | 50.1  |
| ACTB     | 6  | 13 | 6  | 11 | 7  | 13 | 1.2:1 | 1:1   | 41.7  |
| TUBA1C   | 5  | 12 | 5  | 12 | 5  | 12 | 1:1   | 1:1   | 49.9  |
| HSPA8    | 13 | 16 | 13 | 16 | 13 | 16 | 1:1   | 1:1   | 70.9  |
| HNRNPM   | 14 | 16 | 16 | 16 | 12 | 14 | 1:1   | 1.1:1 | 73.6  |

|          |    |    |    |    |    |    |       |       |       |
|----------|----|----|----|----|----|----|-------|-------|-------|
| SLC3A2   | 19 | 19 | 16 | 16 | 20 | 20 | 1.2:1 | 1:01  | 57.9  |
| TUBB     | 4  | 13 | 12 | 12 | 5  | 15 | 1.1:1 | 0.9:1 | 49.6  |
| DSP      | 29 | 29 | 23 | 23 | 36 | 36 | 1.3:1 | 0.8:1 | 331.6 |
| EEF1A2   | 1  | 8  |    |    | 1  | 8  |       | 1:1   | 50.4  |
| TUBA4A   | 3  | 10 | 2  | 9  | 3  | 10 | 1.1:1 | 1:1   | 48.3  |
| HSPA1A   | 8  | 10 | 9  | 11 |    |    | 0.9:1 |       | 63.9  |
| LMNA     | 10 | 10 | 7  | 7  |    |    | 1.4:1 |       | 65.1  |
| HNRNPA3  | 8  | 10 | 1  | 2  | 11 | 13 | 5:1   | 0.8:1 | 37.0  |
| HNRNPH1  | 5  | 8  | 3  | 5  |    |    | 1.6:1 |       | 47.1  |
| GAPDH    | 8  | 8  | 7  | 7  | 8  | 8  | 1.2:1 | 1:1   | 36.0  |
| TUBB4B   | 1  | 10 |    |    | 1  | 11 |       | 0.9:1 | 49.8  |
| ACTC1    | 3  | 10 | 2  | 7  | 2  | 8  | 1.4:1 | 1.2:1 | 42.0  |
| GNB2L1   | 15 | 15 | 15 | 15 | 14 | 14 | 1:1   | 1.1:1 | 35.1  |
| XPO1     | 17 | 17 | 14 | 14 | 17 | 17 | 1.2:1 | 1:1   | 123.3 |
| IGF2BP3  | 8  | 11 |    |    | 9  | 12 |       | 0.9:1 | 63.7  |
| HSPB1    | 8  | 8  | 7  | 7  | 6  | 6  | 1.2:1 | 1.3:1 | 22.8  |
| DDX39A   | 11 | 11 | 10 | 10 | 9  | 9  | 1.1:1 | 1.2:1 | 49.1  |
| HNRNPF   | 5  | 7  | 3  | 5  | 7  | 9  | 1.4:1 | 0.8:1 | 45.6  |
| HSP90AB1 | 7  | 12 | 6  | 10 | 8  | 17 | 1.2:1 | 0.7:1 | 83.2  |
| MYH7     | 7  | 19 | 4  | 10 | 3  | 13 | 1.9:1 | 1.5:1 | 223.0 |
| PHGDH    | 11 | 11 | 10 | 10 | 11 | 11 | 1.1:1 | 1:1   | 56.6  |

|         |    |    |    |    |    |    |       |       |       |
|---------|----|----|----|----|----|----|-------|-------|-------|
| JUP     | 8  | 12 | 8  | 8  | 14 | 14 | 1.5:1 | 0.9:1 | 81.7  |
| DDX5    | 9  | 12 | 7  | 9  | 5  | 9  | 1.3:1 | 1.3:1 | 60.5  |
| DDX17   | 8  | 11 | 6  | 8  | 9  | 13 | 1.4:1 | 0.9:1 | 72.3  |
| IGF2BP1 | 11 | 13 |    |    | 10 | 12 |       | 1.1:1 | 63.4  |
| GCN1L1  | 21 | 21 | 19 | 19 | 20 | 20 | 1.1:1 | 1.1:1 | 292.6 |
| MCCC2   | 13 | 13 | 16 | 16 | 14 | 14 | 0.8:1 | 0.9:1 | 61.3  |
| RNH1    | 11 | 11 | 11 | 11 | 11 | 11 | 1:1   | 1:1   | 49.9  |
| DSG1    | 11 | 11 | 11 | 11 | 13 | 13 | 1:1   | 0.9:1 | 113.7 |
| MCCC1   | 9  | 9  |    |    | 9  | 9  |       | 1:1   | 80.4  |
| AHNAK   | 16 | 18 | 7  | 7  | 23 | 26 | 2.6:1 | 0.7:1 | 628.7 |
| HNRNPA0 | 3  | 5  | 3  | 4  | 4  | 6  | 1.3:1 | 0.8:1 | 30.8  |
| ANXA2   | 10 | 10 | 8  | 8  | 7  | 7  | 1.3:1 | 1.4:1 | 38.6  |
| PCCA    | 11 | 11 | 10 | 10 | 11 | 11 | 1.1:1 | 1:1   | 77.0  |
| PUF60   | 8  | 8  | 7  | 7  | 6  | 6  | 1.2:1 | 1.3:1 | 54.0  |
| RPS3    | 8  | 8  | 7  | 7  | 9  | 9  | 1.2:1 | 0.9:1 | 26.7  |
| CSE1L   | 15 | 15 | 13 | 13 | 13 | 13 | 1.2:1 | 1.1:1 | 107.7 |
| MSH2    | 14 | 14 | 12 | 12 | 15 | 15 | 1.2:1 | 0.9:1 | 104.7 |
| EIF3C   | 11 | 11 | 10 | 10 | 8  | 8  | 1.1:1 | 1.4:1 | 104.0 |
| RUVBL1  | 8  | 8  | 6  | 6  | 10 | 10 | 1.3:1 | 0.8:1 | 50.2  |
| EIF4A1  | 4  | 6  | 7  | 7  |    |    | 0.9:1 |       | 46.1  |
| EIF3F   | 4  | 4  | 3  | 3  |    |    | 1.3:1 |       | 37.5  |

|          |    |    |    |    |    |    |       |       |       |
|----------|----|----|----|----|----|----|-------|-------|-------|
| CCT6A    | 6  | 6  | 4  | 4  |    |    | 1.5:1 |       | 53.3  |
| EIF3B    | 11 | 11 | 13 | 13 | 13 | 13 | 0.9:1 | 0.9:1 | 92.4  |
| RPSA     | 7  | 7  | 7  | 7  | 6  | 6  | 1:1   | 1.2:1 | 29.4  |
| EEF1G    | 8  | 8  | 9  | 9  | 9  | 9  | 0.9:1 | 0.9:1 | 50.1  |
| SF3B1    | 12 | 12 | 15 | 15 | 15 | 15 | 0.8:1 | 0.8:1 | 145.7 |
| MYH6     | 1  | 13 | 1  | 7  | 1  | 11 | 1.9:1 | 1.2:1 | 223.6 |
| IGF2BP2  | 5  | 7  |    |    | 7  | 9  |       | 0.8:1 | 61.8  |
| SLC7A5   | 4  | 4  | 3  | 3  | 3  | 3  | 1.3:1 | 1.3:1 | 55.0  |
| CLTC     | 11 | 11 | 12 | 12 | 16 | 16 | 0.9:1 | 0.7:1 | 187.8 |
| SF3A1    | 11 | 11 | 12 | 12 | 10 | 10 | 0.9:1 | 1.1:1 | 88.8  |
| PKM      | 10 | 10 |    |    | 10 | 10 |       | 1:1   | 57.9  |
| HSP90AA1 | 5  | 10 | 2  | 6  | 8  | 15 | 1.7:1 | 0.7:1 | 84.6  |
| DCD      | 3  | 3  | 3  | 3  | 2  | 2  | 1:1   | 1.5:1 | 11.3  |
| HSPA5    | 6  | 8  | 5  | 7  | 5  | 7  | 1.2:1 | 1.1:1 | 72.3  |
| HNRNPAB  | 4  | 5  | 1  | 2  | 3  | 4  | 2.5:1 | 1.3:1 | 30.3  |
| PCCB     | 8  | 8  | 9  | 9  | 7  | 7  | 0.9:1 | 1.1:1 | 45.4  |
| PCNA     | 7  | 7  | 6  | 6  | 7  | 7  | 1.2:1 | 1:1   | 28.8  |
| EIF3L    | 9  | 9  | 12 | 12 | 12 | 12 | 0.8:1 | 0.8:1 | 61.0  |
| SNRPA1   | 5  | 5  | 6  | 6  | 5  | 5  | 0.8:1 | 1:1   | 28.4  |
| EIF3E    | 8  | 8  | 8  | 8  | 5  | 8  | 1:1   | 1:1   | 52.2  |
| CCT3     | 5  | 5  | 4  | 4  | 5  | 5  | 1.3:1 | 1:1   | 55.6  |

|        |    |    |    |    |    |    |       |       |       |
|--------|----|----|----|----|----|----|-------|-------|-------|
| PIP    | 5  | 5  | 6  | 6  | 6  | 6  | 0.8:1 | 0.8:1 | 16.6  |
| AZGP1  | 8  | 8  | 7  | 7  | 10 | 10 | 1.2:1 | 0.8:1 | 34.2  |
| NCL    | 8  | 8  | 10 | 10 | 6  | 6  | 0.8:1 | 1.3:1 | 76.6  |
| TCP1   | 9  | 9  | 4  | 4  | 9  | 9  | 2.3:1 | 1:1   | 60.3  |
| S100A8 | 3  | 3  | 2  | 2  | 3  | 3  | 1.5:1 | 1:1   | 10.8  |
| EIF3G  | 5  | 5  | 3  | 3  | 5  | 5  | 1.7:1 | 1:1   | 35.6  |
| CDK1   | 8  | 8  | 8  | 8  | 5  | 7  | 1:1   | 1.1:1 | 34.1  |
| TKT    | 5  | 5  | 2  | 2  | 3  | 3  | 2.5:1 | 1.7:1 | 62.8  |
| PABPC1 | 9  | 9  | 3  | 3  | 11 | 14 | 3:1   | 0.6:1 | 61.1  |
| EIF3A  | 11 | 11 | 9  | 9  | 6  | 6  | 1.2:1 | 1.8:1 | 162.5 |
| SF3B2  | 6  | 6  | 7  | 7  | 7  | 7  | 0.9:1 | 0.9:1 | 98.1  |
| PDCD4  | 5  | 5  | 3  | 3  | 4  | 4  | 1.7:1 | 1.3:1 | 50.5  |
| GTF2I  | 7  | 7  | 7  | 7  | 10 | 10 | 1:1   | 0.7:1 | 107.9 |
| CCT8   | 5  | 5  |    |    | 7  | 7  |       | 0.7:1 | 57.6  |
| DHX15  | 8  | 8  | 7  | 7  | 6  | 6  | 1.2:1 | 1.3:1 | 90.9  |
| KARS   | 4  | 4  | 2  | 2  |    |    | 2:1   |       | 68.0  |
| PCBP1  | 4  | 5  | 2  | 3  | 2  | 3  | 1.7:1 | 1.7:1 | 37.5  |
| RPS11  | 4  | 4  | 4  | 4  | 3  | 3  | 1:1   | 1.3:1 | 18.4  |
| VAT1   | 3  | 3  | 4  | 4  | 5  | 5  | 0.8:1 | 0.6:1 | 34.9  |
| UBA52  | 3  | 3  | 3  | 3  |    |    | 1:1   |       | 7.1   |
| BZW1   | 7  | 7  | 7  | 7  |    |    | 1:1   |       | 40.5  |

|          |   |   |    |    |   |   |       |       |       |
|----------|---|---|----|----|---|---|-------|-------|-------|
| SCAMP3   | 3 | 3 | 2  | 2  |   |   | 1.5:1 |       | 35.2  |
| RPS3A    | 3 | 3 | 4  | 4  |   |   | 0.8:1 |       | 22.4  |
| PDS5A    | 6 | 6 | 4  | 4  | 5 | 5 | 1.5:1 | 1.2:1 | 150.7 |
| ENO1     | 4 | 4 | 2  | 2  | 6 | 6 | 2:1   | 0.7:1 | 47.1  |
| CSTA     | 4 | 4 | 3  | 3  | 3 | 3 | 1.3:1 | 1.3:1 | 11.0  |
| MSH6     | 6 | 6 | 11 | 11 | 9 | 9 | 0.6:1 | 0.7:1 | 152.7 |
| RPS10    | 3 | 3 | 3  | 3  | 3 | 3 | 1:1   | 1:1   | 18.9  |
| PRDX1    | 3 | 4 | 2  | 3  | 3 | 4 | 1.3:1 | 1:1   | 22.1  |
| U2AF2    | 3 | 3 | 3  | 3  | 3 | 3 | 1:1   | 1:1   | 33.9  |
| XPO5     | 8 | 8 | 6  | 6  | 6 | 6 | 1.3:1 | 1.3:1 | 136.2 |
| RFC2     | 5 | 5 | 4  | 4  | 5 | 5 | 1.3:1 | 1:1   | 35.2  |
| RPS12    | 5 | 5 | 5  | 5  | 5 | 5 | 1:1   | 1:1   | 14.5  |
| DSC1     | 6 | 6 | 3  | 3  | 5 | 5 | 2:1   | 1.2:1 | 93.8  |
| PCBP2    | 2 | 3 | 2  | 3  | 3 | 4 | 1:1   | 0.8:1 | 31.7  |
| RPS19    | 3 | 3 | 3  | 3  | 5 | 5 | 1:1   | 0.6:1 | 16.1  |
| SNRNP200 | 6 | 6 | 8  | 8  | 7 | 7 | 0.8:1 | 0.9:1 | 244.4 |
| SLC16A3  | 3 | 3 | 3  | 3  | 2 | 2 | 1:1   | 1.5:1 | 49.4  |
| CASP14   | 3 | 3 | 1  | 1  | 2 | 2 | 3:1   | 1.5:1 | 27.7  |
| SPTAN1   | 8 | 8 | 8  | 8  | 7 | 7 | 1:1   | 1.1:1 | 282.1 |
| ASS1     | 4 | 4 | 3  | 3  | 3 | 3 | 1.3:1 | 1.3:1 | 46.5  |
| EIF3D    | 4 | 4 | 3  | 3  | 4 | 4 | 1.3:1 | 1:1   | 58.1  |



|           |   |   |   |   |    |    |       |       |       |
|-----------|---|---|---|---|----|----|-------|-------|-------|
| PRDX2     | 3 | 4 | 3 | 4 | 3  | 4  | 1:1   | 1:1   | 21.9  |
| HRNR      | 3 | 3 | 2 | 2 | 1  | 1  | 1.5:1 | 3:1   | 282.2 |
| PFKP      | 6 | 6 | 7 | 7 |    |    | 0.9:1 |       | 85.3  |
| FANCI     | 6 | 6 | 6 | 7 | 6  | 7  | 0.9:1 | 0.9:1 | 149.2 |
| TNPO3     | 4 | 4 | 6 | 6 | 6  | 6  | 0.7:1 | 0.7:1 | 97.3  |
| DNAJA2    | 3 | 3 | 2 | 2 |    |    | 1.5:1 |       | 45.7  |
| RPS16     | 4 | 4 | 5 | 5 | 4  | 4  | 0.8:1 | 1:1   | 14.4  |
| PRPF19    | 5 | 5 | 2 | 2 | 6  | 6  | 2.5:1 | 0.8:1 | 55.1  |
| GNAS      | 6 | 6 | 7 | 7 | 8  | 8  | 0.9:1 | 0.8:1 | 44.2  |
| EIF3I     | 4 | 4 | 5 | 5 | 3  | 3  | 0.8:1 | 1.3:1 | 36.5  |
| TBL1XR1   | 3 | 3 | 2 | 2 | 3  | 3  | 1.5:1 | 1:1   | 55.6  |
| SERPINB12 | 3 | 3 | 3 | 3 | 4  | 4  | 1:1   | 0.8:1 | 46.2  |
| XRCC6     | 7 | 7 | 4 | 4 | 10 | 10 | 1.8:1 | 0.7:1 | 64.2  |
| ALDOA     | 4 | 4 | 5 | 5 | 7  | 7  | 0.8:1 | 0.6:1 | 39.4  |
| TRIM28    | 5 | 5 | 2 | 2 | 4  | 4  | 2.5:1 | 1.3:1 | 79.4  |
| DARS      | 5 | 5 |   |   | 5  | 5  |       | 1:1   | 57.1  |
| CDKN2AIP  | 4 | 4 |   |   | 3  | 3  |       | 1.3:1 | 61.1  |
| DDX46     | 6 | 6 | 5 | 5 | 6  | 6  | 1.2:1 | 1:1   | 117.3 |
| RPS4X     | 3 | 3 | 3 | 3 | 4  | 4  | 1:1   | 0.8:1 | 29.6  |
| TOE1      | 3 | 3 |   |   | 3  | 3  |       | 1:1   | 56.5  |
| S100A7    | 3 | 3 | 2 | 2 | 4  | 4  | 1.5:1 | 0.8:1 | 11.5  |

|          |   |   |   |   |   |   |       |       |       |
|----------|---|---|---|---|---|---|-------|-------|-------|
| LDHB     | 4 | 4 |   |   | 5 | 5 |       | 0.8:1 | 36.6  |
| Septin-9 | 5 | 5 | 4 | 4 | 7 | 7 | 1.3:1 | 0.7:1 | 63.5  |
| RFC5     | 5 | 5 |   |   | 4 | 4 |       | 1.3:1 | 36.1  |
| HNRNPM   | 1 | 3 |   |   | 1 | 3 |       | 1:1   | 40.0  |
| XRN2     | 4 | 4 |   |   | 4 | 4 |       | 1:1   | 99.9  |
| FUS      | 3 | 3 | 2 | 2 | 3 | 3 | 1.5:1 | 1:1   | 53.3  |
| DDB1     | 5 | 5 | 3 | 3 | 3 | 3 | 1.7:1 | 1.7:1 | 121.6 |
| EIF3M    | 3 | 3 | 3 | 3 | 5 | 5 | 1:1   | 0.6:1 | 21.7  |
| RPS25    | 3 | 3 | 4 | 4 | 3 | 3 | 0.8:1 | 1:1   | 13.7  |
| EPRS     | 6 | 6 | 4 | 4 | 5 | 5 | 1.5:1 | 1.2:1 | 170.5 |
| RFC4     | 4 | 4 | 7 | 7 | 6 | 6 | 0.6:1 | 0.7:1 | 39.7  |
| ECM29    | 4 | 4 | 6 | 6 | 6 | 6 | 0.7:1 | 0.7:1 | 204.2 |
| RBM17    | 3 | 3 | 2 | 2 |   |   | 1.5:1 |       | 44.9  |
| KDM1A    | 4 | 4 | 3 | 3 | 4 | 4 | 1.3:1 | 1:1   | 92.8  |
| RPS8     | 3 | 3 |   |   | 2 | 2 |       | 1.5:1 | 21.9  |
| MCM3     | 4 | 4 | 2 | 2 | 5 | 5 | 2:1   | 0.8:1 | 90.9  |
| CCT4     | 7 | 7 | 4 | 4 | 8 | 9 | 1.8:1 | 0.8:1 | 52.3  |
| ATP1A1   | 4 | 4 | 3 | 3 |   |   | 1.3:1 |       | 109.5 |
| DDX1     | 4 | 4 | 1 | 1 | 7 | 7 | 4:1   | 0.6:1 | 82.4  |
| XRCC5    | 5 | 5 | 4 | 4 | 7 | 7 | 1.3:1 | 0.7:1 | 82.7  |
| PPIA     | 3 | 3 | 2 | 2 | 4 | 4 | 1.5:1 | 0.8:1 | 13.0  |

|          |   |   |   |   |    |    |       |       |       |
|----------|---|---|---|---|----|----|-------|-------|-------|
| EFTUD2   | 3 | 3 | 5 | 5 | 7  | 8  | 0.6:1 | 0.4:1 | 105.3 |
| SERPINB3 | 4 | 4 | 2 | 2 | 5  | 8  | 2:1   | 0.5:1 | 44.5  |
| TGM3     | 3 | 3 | 7 | 7 | 5  | 5  | 0.4:1 | 0.6:1 | 76.6  |
| IPO7     | 4 | 4 | 6 | 6 | 5  | 5  | 0.7:1 | 0.8:1 | 119.4 |
| FHL2     | 3 | 3 | 2 | 2 | 1  | 1  | 1.5:1 | 3:1   | 32.2  |
| IARS     | 4 | 4 | 2 | 2 | 2  | 2  | 2:1   | 2:1   | 131.7 |
| EWSR1    | 4 | 4 | 3 | 3 | 3  | 3  | 1.3:1 | 1.3:1 | 61.2  |
| CAT      | 3 | 3 | 3 | 3 | 2  | 2  | 1:1   | 1.5:1 | 59.7  |
| ACTN4    | 4 | 4 |   |   | 4  | 4  |       | 1:1   | 104.8 |
| SND1     | 3 | 3 |   |   | 4  | 4  |       | 0.8:1 | 101.9 |
| XPO7     | 5 | 5 | 5 | 5 | 6  | 6  | 1:1   | 0.8:1 | 123.8 |
| FASN     | 3 | 3 | 3 | 3 | 1  | 1  | 1:1   | 3:1   | 273.3 |
| FLNA     | 4 | 4 |   |   | 11 | 11 |       | 0.4:1 | 276.4 |
| PSMD2    | 3 | 3 | 2 | 2 | 5  | 5  | 1.5:1 | 0.6:1 | 82.1  |
| PKP1     | 3 | 3 | 2 | 2 | 3  | 3  | 1.5:1 | 1:1   | 80.4  |
| RFC3     | 3 | 3 | 4 | 4 | 5  | 5  | 0.8:1 | 0.6:1 | 34.7  |
| RAN      | 3 | 3 |   |   | 2  | 2  |       | 1.5:1 | 22.4  |
| RBBP7    | 1 | 3 |   |   | 2  | 2  |       | 1.5:1 | 46.9  |
| RCC2     | 3 | 3 |   |   | 5  | 5  |       | 0.6:1 | 56.0  |
| RPN1     | 3 | 3 |   |   | 2  | 2  |       | 1.5:1 | 68.5  |
| RCN1     | 3 | 3 | 3 | 3 | 4  | 4  | 1:1   | 0.8:1 | 33.0  |

|           |   |   |   |   |   |   |       |       |       |
|-----------|---|---|---|---|---|---|-------|-------|-------|
| PRPF8     | 3 | 3 | 4 | 4 | 4 | 4 | 0.8:1 | 0.8:1 | 273.4 |
| MCM4      | 4 | 4 | 3 | 3 | 6 | 6 | 1.3:1 | 0.7:1 | 96.5  |
| SEPTIN2   | 3 | 3 | 5 | 5 | 4 | 4 | 0.6:1 | 0.8:1 | 36.9  |
| H3BN98    | 3 | 3 | 2 | 2 | 3 | 3 | 1.5:1 | 1:1   | 27.2  |
| RPS13     | 3 | 3 | 2 | 2 |   |   | 1.5:1 |       | 16.7  |
| FOXP4     | 3 | 3 | 1 | 1 | 2 | 2 | 3:1   | 1.5:1 | 72.2  |
| PLAA      | 3 | 3 | 1 | 1 | 1 | 1 | 3:1   | 3:1   | 66.7  |
| TFRC      | 3 | 3 | 1 | 1 | 5 | 5 | 3:1   | 0.6:1 | 84.8  |
| COPG1     | 3 | 3 |   |   | 4 | 4 |       | 0.8:1 | 97.7  |
| IGHA1     | 3 | 3 |   |   | 4 | 7 |       | 0.4:1 | 37.6  |
| RNPUL2-BS | 3 | 3 |   |   | 2 | 2 |       | 1.5:1 | 84.6  |
| TRIP13    | 3 | 3 | 1 | 1 | 3 | 3 | 3:1   | 1:1   | 48.5  |
| EEF2      | 3 | 3 | 2 | 2 | 2 | 3 | 1.5:1 | 1:1   | 95.3  |
| PSMD3     | 3 | 3 | 2 | 2 | 2 | 2 | 1.5:1 | 1.5:1 | 60.9  |
| CHERP     | 3 | 3 | 2 | 2 | 2 | 2 | 1.5:1 | 1.5:1 | 103.6 |
| ATXN10    | 3 | 3 |   |   | 3 | 3 |       | 1:1   | 46.3  |
