# Supplementary material
Source: publisher figshare collection journal article supplement (https://tandf.figshare.com/articles/dataset/_/8153282)
Supplement: Supplementary file 3 [file 1]

**Suppl Table S2 Sequences of siRNAs used in this study**

| <b>Name</b> | <b>Sense (5'-----&gt;3')</b>  | <b>Antisense (5'-----&gt;3')</b> |
|-------------|-------------------------------|----------------------------------|
| hnRNPA1     | CUACAAUGAUUUUGGGAUdTdT        | AUUCCTCAAAAUCAUUGUAGdTdT         |
| hnRNPD      | GAUCCUAUCACAGGGCGAUdTdT       | AUCGCCCUGUGAUAGGAUCdTdT          |
| CCAR2       | CAGCUUGCAUGACUACUUUdTdT       | AAAGUAGUCAUGCAAGCUGdTdT          |
| YBX1        | CGACGCAGACGCCAGAAAdTdT        | UUUCUGGGCGUCUGCGUCGdTdT          |
| hnRNPU      | CCUGGGAAUCGTGGCGGATATAATAdTdT | UAUUUAUAUCCGCCACGAUUCCCAGGdTdT   |
| YBX3        | CAACGUCAGAAAUGGAUAdTdT        | AUAUCCAUUUCUGACGUUGdTdT          |
| hnRNPC      | CAACGGGACUAUUUAUGAUAdTdT      | UAUCAUAAUAGUCCCGUUGdTdT          |
| ILF3        | GGCAGAGUCCGAUAACAUGdTdT       | CAUGUUAUCGGACUCUGCCdTdT          |
| ELAVL1      | GAGGCAAUUACCAGUUUCAdTdT       | UGAAACUGGUAAUUGCCUCdTdT          |
| DHX9        | GUAAAUGAACGUAUGCUGAdTdT       | UCAGCAUACGUUCAUUUACdTdT          |
| PTBP1       | GCACAGUGUUGAAGAUCAUdTdT       | AUGAUCUUAACACUGUGCdTdT           |
| ILF2        | AGUCGUGGAAAGCCUAAGAdTdT       | UCUUAGGCUUCCACGACUdTdT           |
| BUB3        | AGCGACUGUGCCAAUUCCAdTdT       | UGGAAUUGGCACAGUCGCUdTdT          |
| MATR3       | AGACUCCATGGACUCUUAdTdT        | UAAGAGUCCAUGGAAGUCUdTdT          |
| ARG1        | GGGCGGAGACCACAGUUUGdTdT       | CAAACUGUGGUCUCCGCCCdTdT          |
| RPS7        | UGCUCUCGCGAGAUUUGGGUCUCUdTdT  | AAGAGACCCAAAUCUCGCGAGAGCAdTdT    |

|                |                               |                               |
|----------------|-------------------------------|-------------------------------|
| CCT7           | GAAUGAUUCAGUGGUGGCdTdT        | AGCCACCACUGAAUCAUUCdTdT       |
| RUVBL2         | UAACAAGGAUUGAGCGAAUdTdT       | AUUCGCUCAAUCCUUGUUA dTdT      |
| FAM120A        | CAAACAAAGGCAGAAGGCUCGUCCAdTdT | UGGACGAGCCUUCUGCCUUUGUUUGdTdT |
| hnRNPH3        | CAAUUACAGUGGAGGAUAUdTdT       | AUAUCCUCCACUGUAAUUGdTdT       |
| HNRNPUL1       | GAUAGUACUGGUUCCACUGCUGGGCdTdT | GCCCAGCAGUGGAACCAGUACUAUC     |
| PPP1CA         | CCGCAUCUAUGGUUUCUACdTdT       | GUAGAAACCAUAGAUGCGGdTdT       |
| RBBP4          | CUUGUAUCAUCGCAACAAAdTdT       | UUUGUUGCGAUGAUACAAGdTdT       |
| SSB            | UUUGCCACGGGACAAGUUUdTdT       | AAACUUGUCCCGUGGCAAA dTdT      |
| eIF4A3         | AGACAUGACUAAAGUGGAA dTdT      | 5UUCCACUUUAGUCAUGUCUdTdT      |
| SMC1A          | GCAGUAUGCUUGUGGCAAUdTdT       | AUUGCCACAAGCAUACUGCdTdT       |
| FUBP1          | GGAGGAGUUAACGACGCUUdTdT       | AAGCGUCGUUAACUCCUCCdTdT       |
| SMCHD1         | CCGUUAUCAUCCAUUCUUA dTdT      | UAAGAAUGGAUGAUAAACGGdTdT      |
| siRNA1- hnRNPK | CGAUGAAACCUAUGAUUAUdTdT       | AUAAUCAUAGGUUUCAUCGdTdT       |
| siRNA1- hnRNPK | GAGCGCAUAUUGAGUAUCAdTdT       | UGAUACUCAAU AUGCGCUCdTdT      |
| SF3A3          | GGAGGAGCUCAAUGCCAUUdTdT       | AAUGGCAUUGAGCUCCUCCdTdT       |
| hnRNPA2/B1     | GCAACCUUCUAAACUACGGUdTdT      | ACCGUAGUUAGAAGGUUGCdTdT       |
| hnRNPR         | GGUGGACGUUAUUCUCUAUdTdT       | AUAGAGAAUAACGUCCACCdTdT       |
| SFPQ           | CUUUCUGUUCGUAAUCUUUCA dTdT    | UGAAAGAUUACGAACAGAAAGdTdT     |

|                |                           |                           |
|----------------|---------------------------|---------------------------|
| SNRPD1         | AACGCTGAGTATTCGAGGAAAdTdT | UUUCCUCGAAUACUCAGCGUUDTdT |
| SNRPD2         | CCCGCTCATCGCCGGCAAGTAdTdT | UACUUGCCGGCGAUGAGCGGGdTdT |
| SNRPD3         | CACCCATGTAAAGAGCATGAdTdT  | UCAUGCUCUUUAACAUGGGUGdTdT |
| siRNA1-SNRPC   | AGGCCUUAUUGUAUCGGUUDTdT   | AACCGATAACAATAAGGCCTdTdT  |
| siRNA2-SNRPC   | stB0007947A               | stB0007947A               |
| siRNA1-SNRPA   | siG141204102402           | siG141204102402           |
| siRNA2-SNRPA   | siG000006626C             | siG000006626C             |
| siRNA1-SNRNP70 | stB0001934A               | stB0001934A               |
| siRNA2-SNRNP70 | siB180309104126           | siB180309104126           |
| RAVER1         | siB081120140719           | siB081120140719           |
| ALB            | siG000000213B             | siG000000213B             |
| PTBP3          | siG150723025242           | siG150723025242           |
| CCT2           | siB170914114508           | siB170914114508           |
| STRBP          | siB170914114529           | siB170914114529           |
| hZFR           | siG000051663B             | siG000051663B             |
| CCT5           | siG170814050311           | siG170814050311           |
| hnRNPLL        | siB170911145145           | siB170911145145           |
| TROVE2         | stB0001941A               | stB0001941A               |

|       |                |                |
|-------|----------------|----------------|
| SF3B3 | stB0010311A    | stB0010311A    |
| siNC  | siN05815122147 | siN05815122147 |
