# Supplementary material
Source: publisher figshare collection journal article supplement (https://tandf.figshare.com/articles/dataset/_/8153282)
Supplement: Supplementary file 6 [file 1]

Suppl Fig. 4

Potential 5'ss  
AGGAGGTGATCAGCAAATGTTTGTTGAAAAGGTTTGACAGGTCAGTCCCTTCCCACCCCTCTTGCTTGTCTTACTTGTCTTATTATTCTCCAACAGCACTCCAGGCA  
GCCCTTGTCCACGGGCTCTCCTTGCATCAGCCAAGCTTCTTGAAAGGCCTGTCTACACTTGCTGTCTTCCTTCCTCACCTCCAATTCCTCTTCAACCCACTGCTTCC  
TGACTCGCTCTACTCCGTGGAAGCACGCTCACAAAGGCACGTGGGCCGTGGCCCGGCTGGGTCGGCTGAAGAACTGCGGATGGAAGCTGCGGAAGAGGCCCTG  
ATGGGGCCCAACATCCCGGACCCAAGTCTTCTTCCTG

FIMO Prediction with motif from the Shen Lab (CAGGTGAGT): CAGGTCAGT P = 8.66e-05

FIMO Prediction with motif from the Lander Lab (GGTAAGTA): GGTCAGTC P =8.38e-04
