# Supplementary material
Source: publisher figshare collection journal article supplement (https://tandf.figshare.com/articles/dataset/_/8153282)

Suppl Fig. 5

(A)

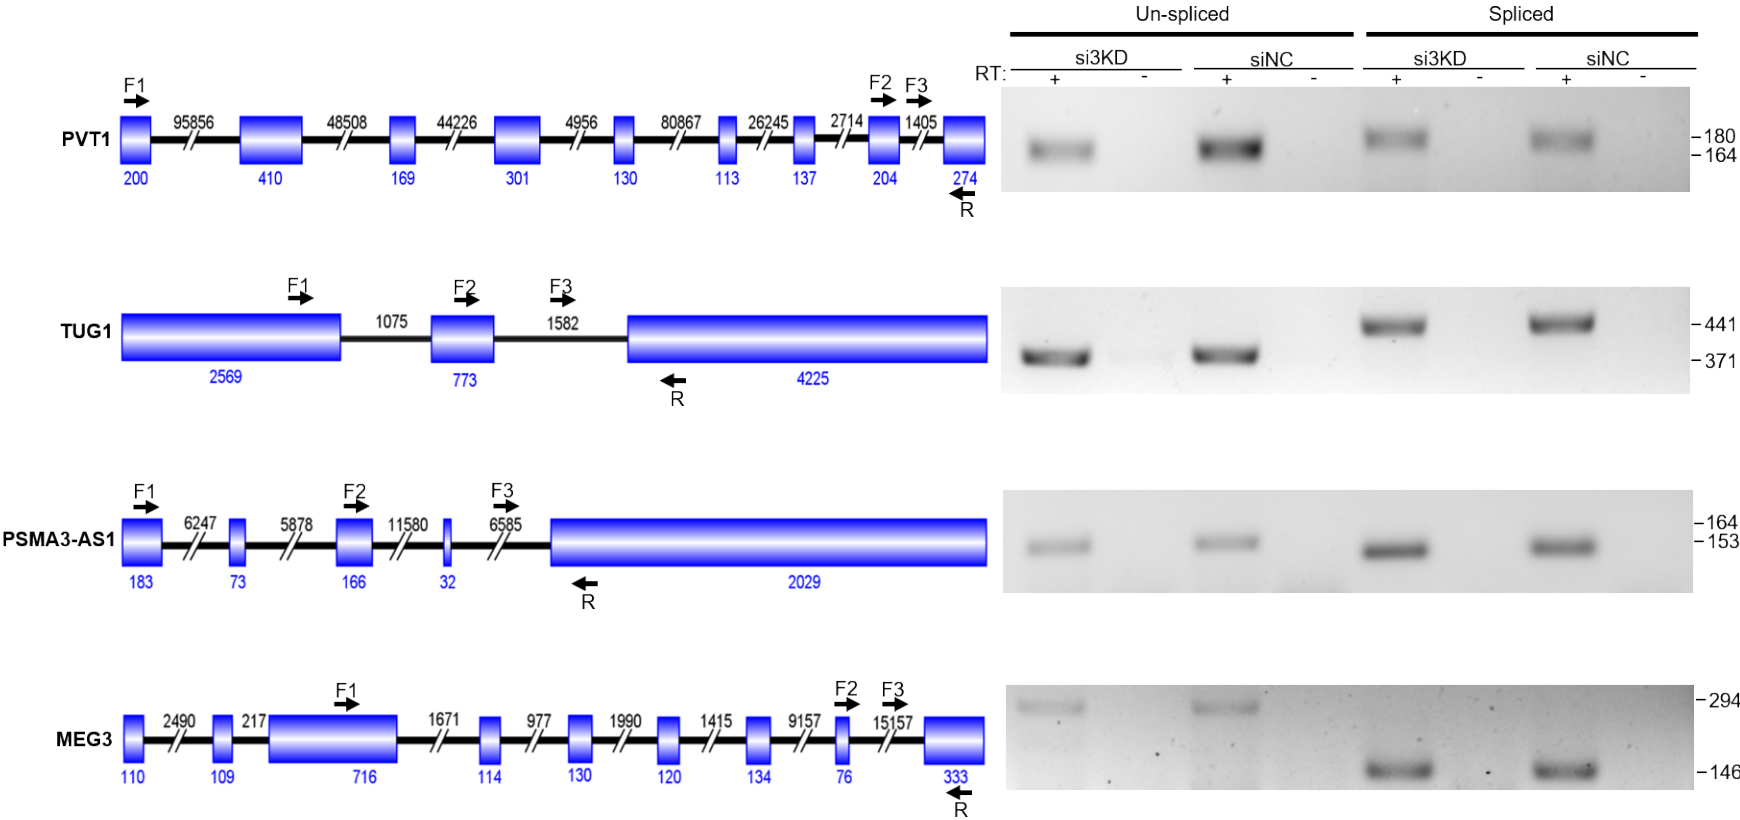

(B)

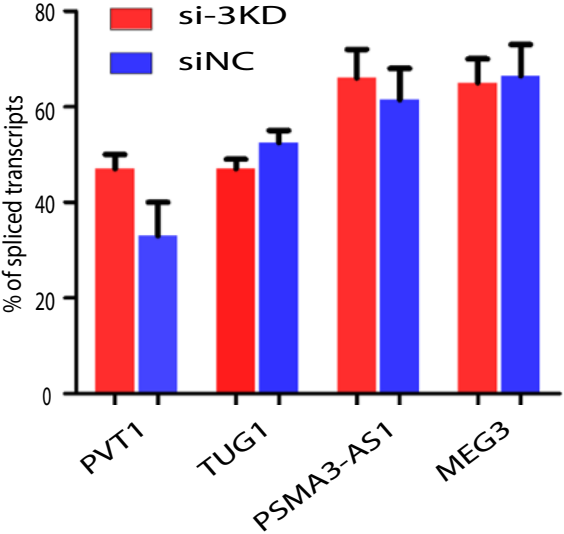

(C)

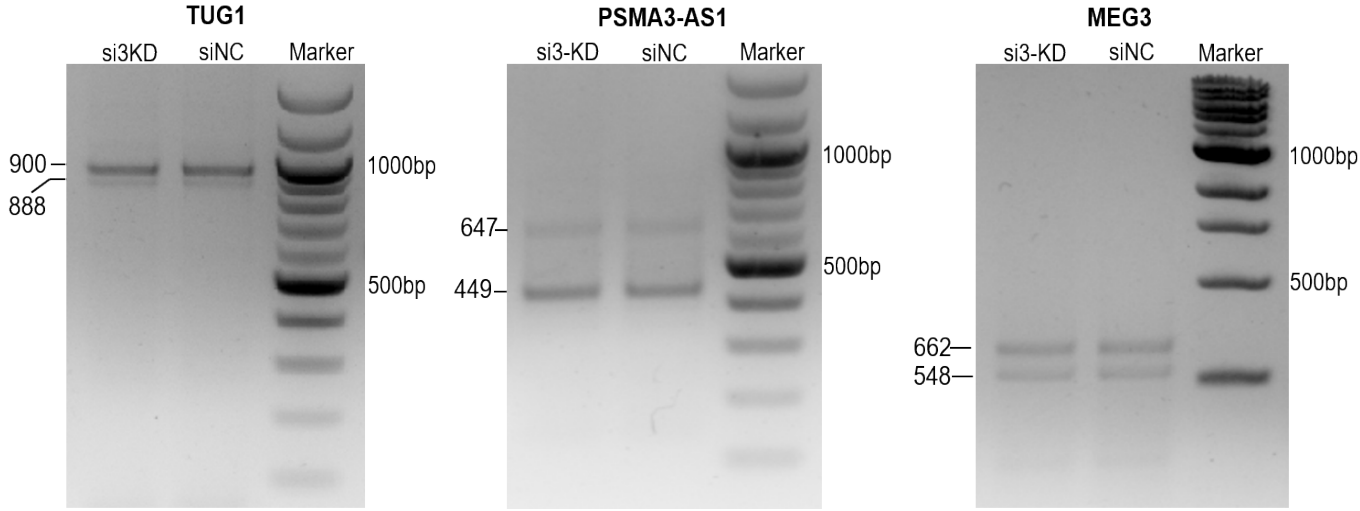

Supplement: Supplementary file 4 [file 1]

Suppl Fig. S1

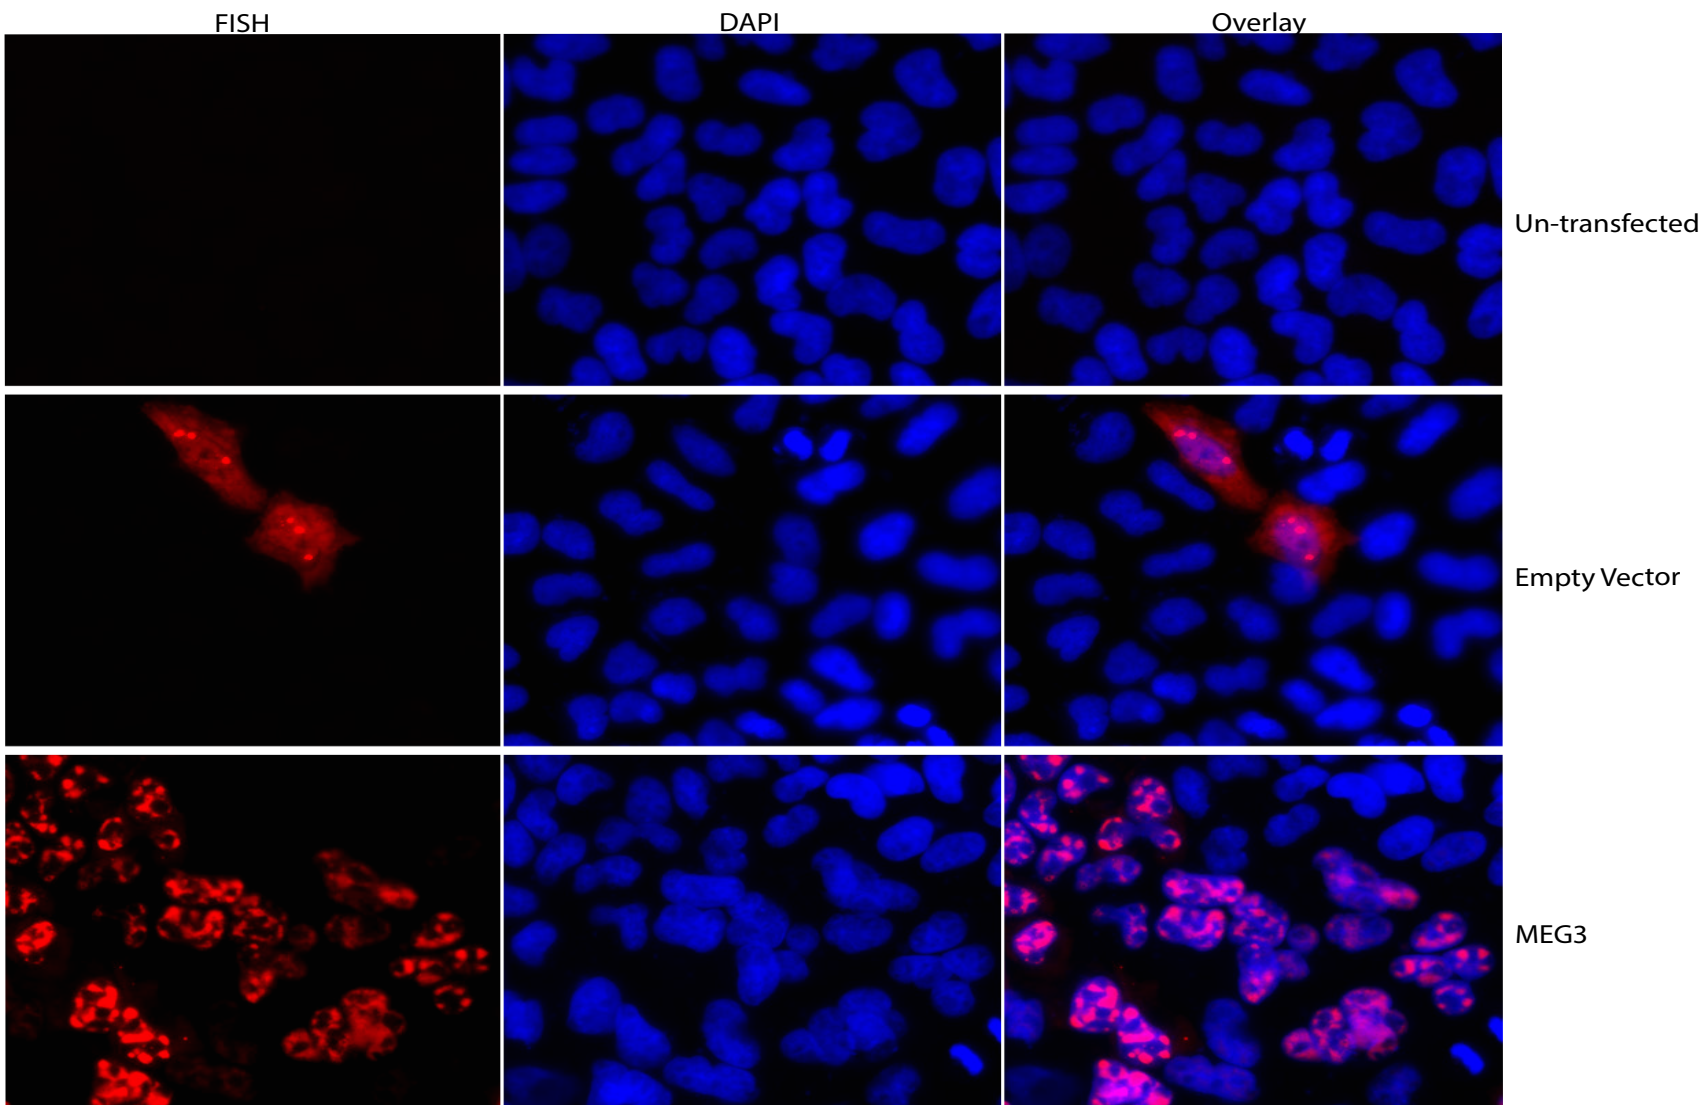

Supplement: Supplementary file 5 [file 1]

Suppl Fig 3

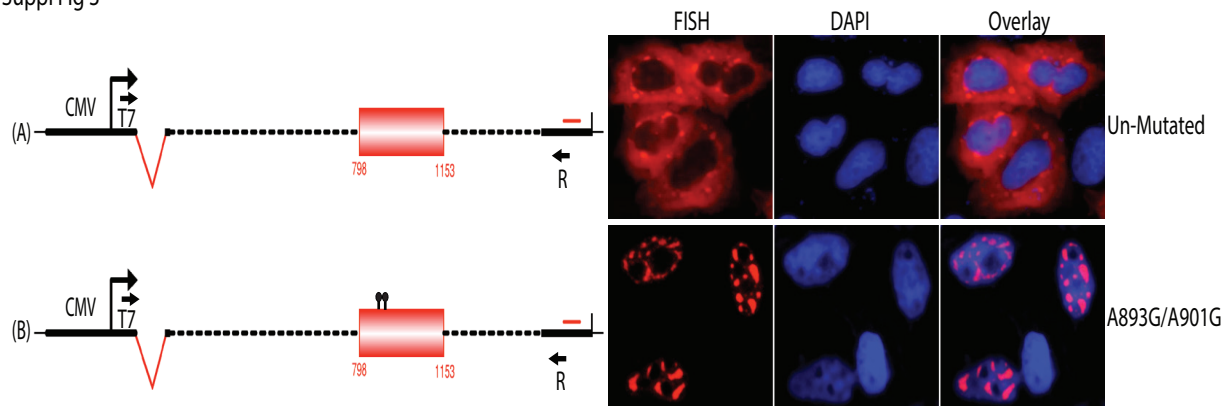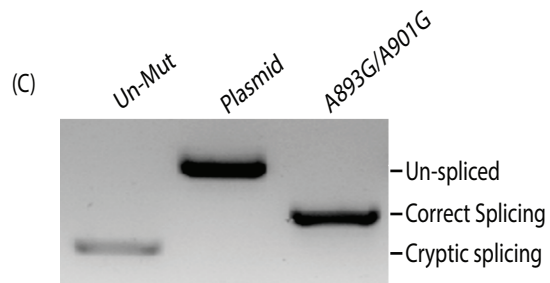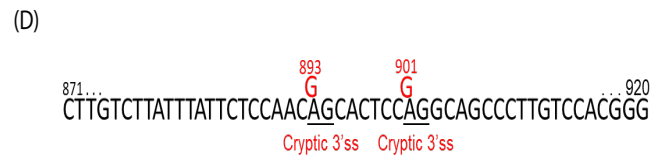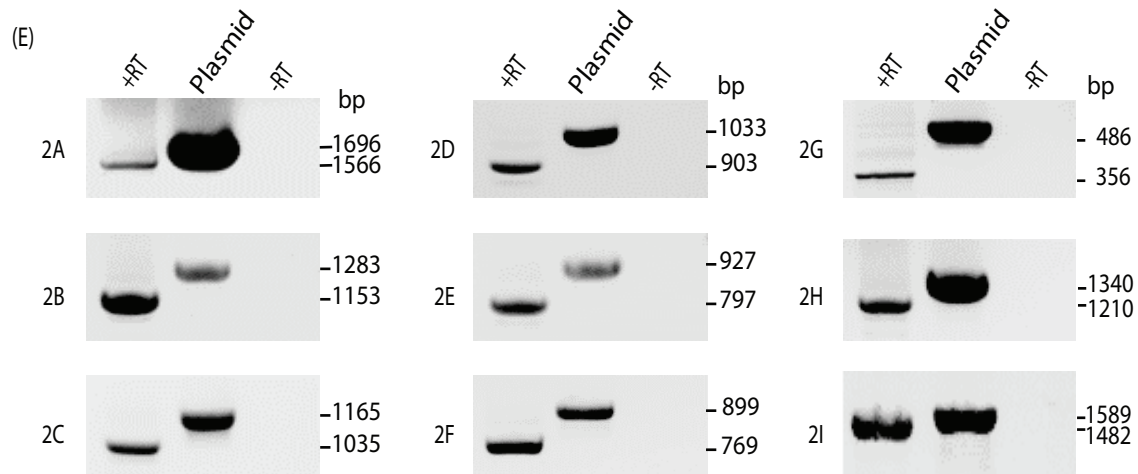

Supplement: Supplementary file 7 [file 1]

Suppl Fig. 2. **A**

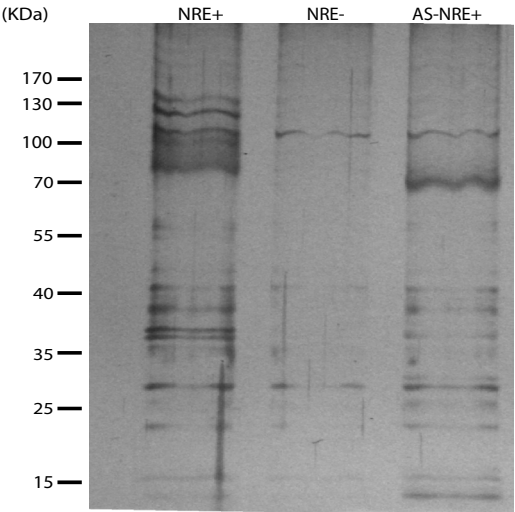

**B**

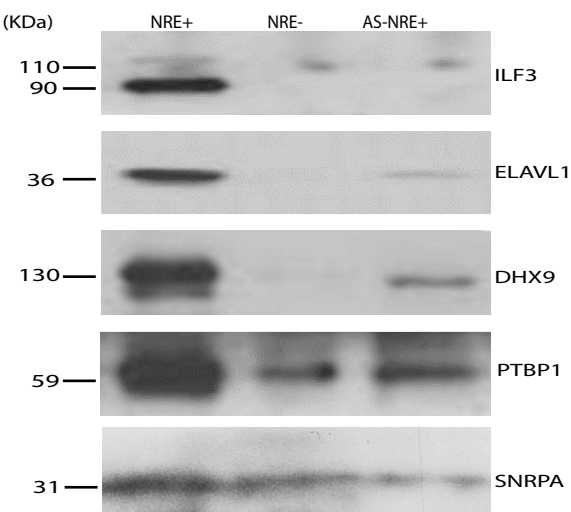

Supplement: Supplementary file 8 [file 1]
